# Supplementary material for: Immunosuppression reduction when administering a booster dose of the BNT162b2 mRNA SARS-CoV-2 vaccine in kidney transplant recipients without adequate humoral response following two vaccine doses: protocol for a randomised controlled trial (BECAME study)
Source: HighWire-hosted journal article supplement (doi:10.1136/bmjopen-2021-055611), 2021-10-01
Supplement: bmjopen-2021-055611supp001_data_supplement.pdf [file bmjopen-2021-055611supp001_data_supplement.pdf]

## Appendix

### Part A: Trial flow

### Part B: Instructions for study participant - immunosuppression management

### Part C: Questionnaire for adverse events

#### A. Trial flow

##### Invitation for a first study visit:

Kidney transplant recipients > 6 months post transplant; and  $\geq 3$  weeks post 2<sup>nd</sup> vaccine

**First visit:** informed consent; anti-spike antibody test; tacrolimus levels; written instruction for the following steps provided (See Appendix part B)

##### Between first and second visit:

Negative serology -> randomization of participants in the randomized controlled trial (RCT) to no intervention or immunosuppression reduction -> study coordinator instructions for RCT participants by phone\*

**Second visit:** vaccination for all participants (observational and RCT); further instructions for RCT participants on the intervention

##### Follow up since vaccination:

At 2 weeks: serology all, T-cell assay for subset, adverse events, other evaluations \*\*

At 3 months: serology all, T-cell assay for subset, other evaluations \*\*

At 6 months: serology all, T-cell assay for subset, other evaluations \*\*

At 12 months: serology all, T-cell assay for subset, other evaluations \*\*

\* No intervention arm – do not change immunosuppressive regimen;

immunosuppression reduction arm – stop mycophenolic 4 days before second visit

(vaccination) and resume one week after vaccination

\*\* Evaluation for kidney rejection (creatinine at each visit) and SARS-CoV-2

infection (patient interview and data from computerized records)

## **B. Instructions for study participant - immunosuppression management**

Dear participant,

You participate in this randomised controlled trial to evaluate the safety and effectiveness of a booster (third) dose of mRNA SARS-CoV-2 BNT162b2 vaccine with or without immunosuppression reduction.

In this study you will be randomised by a computer to be in one of two arms of the study. Following randomization, you will be informed by the study coordinator, who is a nurse in the transplantation clinic, to which arm you belong:

Arm 1 – immunosuppression continuation: continue with your medications as usual before and after the third vaccine injection date.

Arm 2 - immunosuppression reduction: stop taking Myfortic or Cellcept from 4 days before your scheduled vaccine date and 7 days after. Please continue with all your other medications as usual. 4 days before the vaccine – if the vaccine is on Thursday, you stop Myfortic or Cellcept on Sunday and resume on next Thursday; if the vaccine is on Wednesday, you stop Myfortic or Cellcept on Saturday and resume on next Wednesday.

If you have any questions, don't hesitate to contact the study team and/or the transplantation clinic.

### C. Questionnaire for adverse events

Did you have any of these symptoms after the first vaccine injection?

| 1 <sup>st</sup> vaccine date: | yes | No | Severity |
|-------------------------------|-----|----|----------|
| Local pain on injection site  |     |    |          |
| Muscle pain                   |     |    |          |
| headache                      |     |    |          |
| Fatigue                       |     |    |          |
| Allergic reaction             |     |    |          |
| Fever                         |     |    |          |
| Lymph node enlargement        |     |    |          |
| Need of medical treatment     |     |    |          |
| Need of hospitalization       |     |    |          |

Did you have any of these symptoms after the second vaccine injection?

| 2 <sup>nd</sup> vaccine date: | yes | No | Severity |
|-------------------------------|-----|----|----------|
| Local pain on injection site  |     |    |          |
| Muscle pain                   |     |    |          |
| headache                      |     |    |          |
| Fatigue                       |     |    |          |
| Allergic reaction             |     |    |          |
| Fever                         |     |    |          |
| Lymph node enlargement        |     |    |          |
| Need of medical treatment     |     |    |          |
| Need of hospitalization       |     |    |          |
